# Supplementary material for: Evolution of Treatment Paradigms in Idiopathic Intracranial Hypertension: A 25-Year Bibliometric Analysis (2000–2024)
Source: Research Square preprint supplement (doi:10.21203/rs.3.rs-8660463/v1), 2026-01-30
Supplement: Supplementary file 1 [file 9fb9cd0ef07989f21bd7fce3.docx]

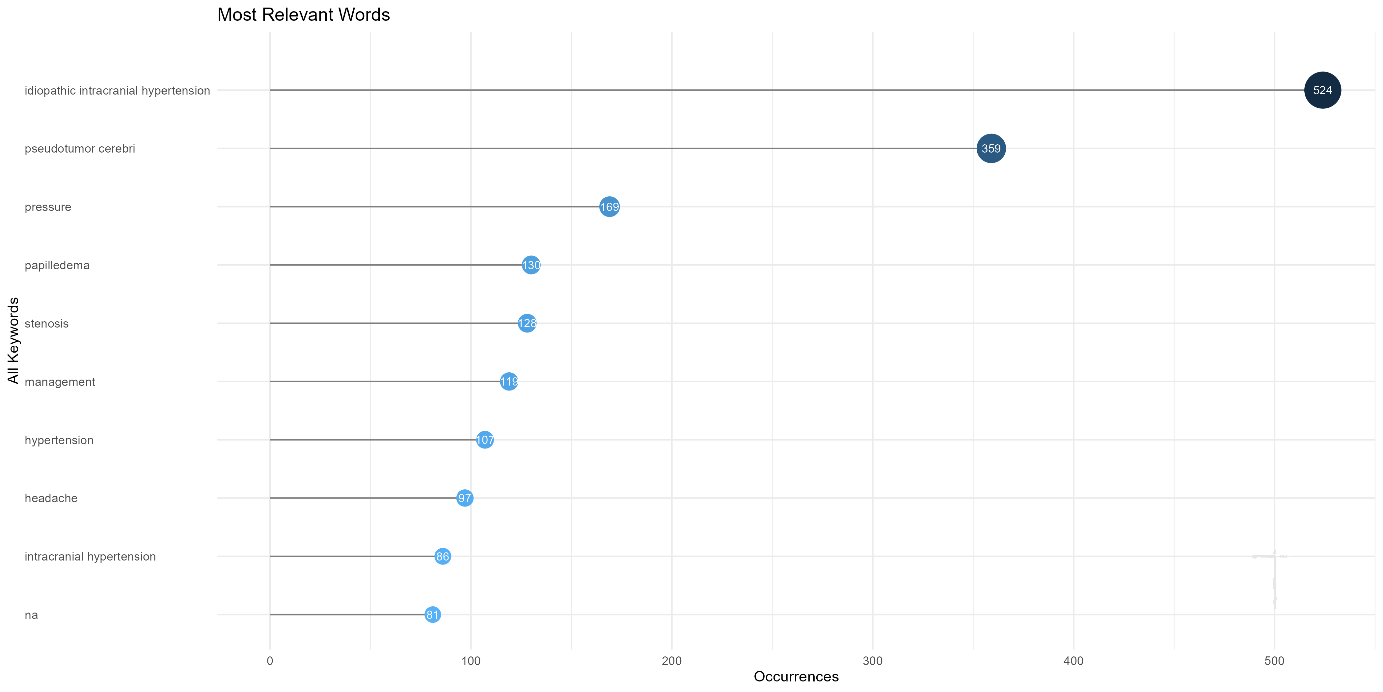


**Figure S1a. Keyword Occurrences (2000–2024)** Idiopathic intracranial hypertension' (n=524) and 'pseudotumor cerebri' (n=359) were the terms with the highest frequency. These were followed by clinical features (pressure, papilledema, headache) and pathophysiologic terms (stenosis, venous).


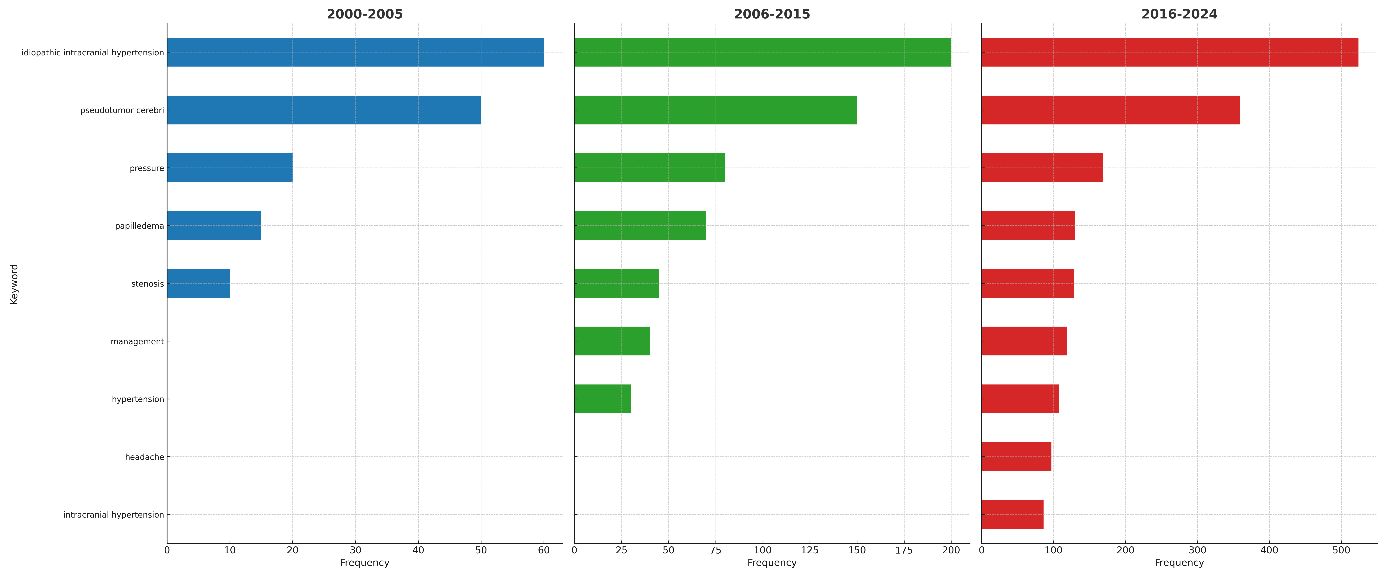


**Figure S1b. Keyword frequency timeline (2000–2005, 2006–2015, 2016–2024).**
Idiopathic intracranial hypertension' and 'pseudotumor cerebri' were the dominant terms in all periods. While only five terms were listed in the 2000-2005 period, nine terms appeared in the 2006-2015 and 2016-2024 periods. The terms 'management', 'hypertension' and 'headache' appeared in the middle period, while the term 'intracranial hypertension' became prominent in the last period.


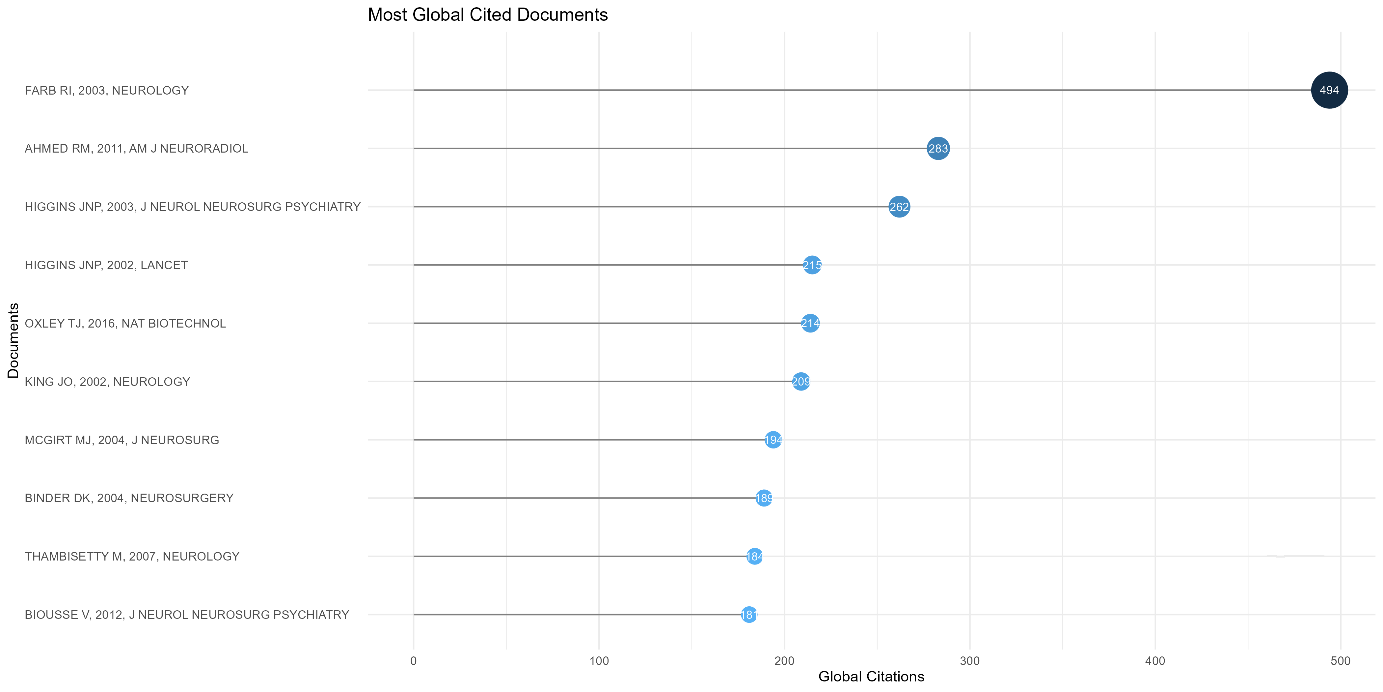


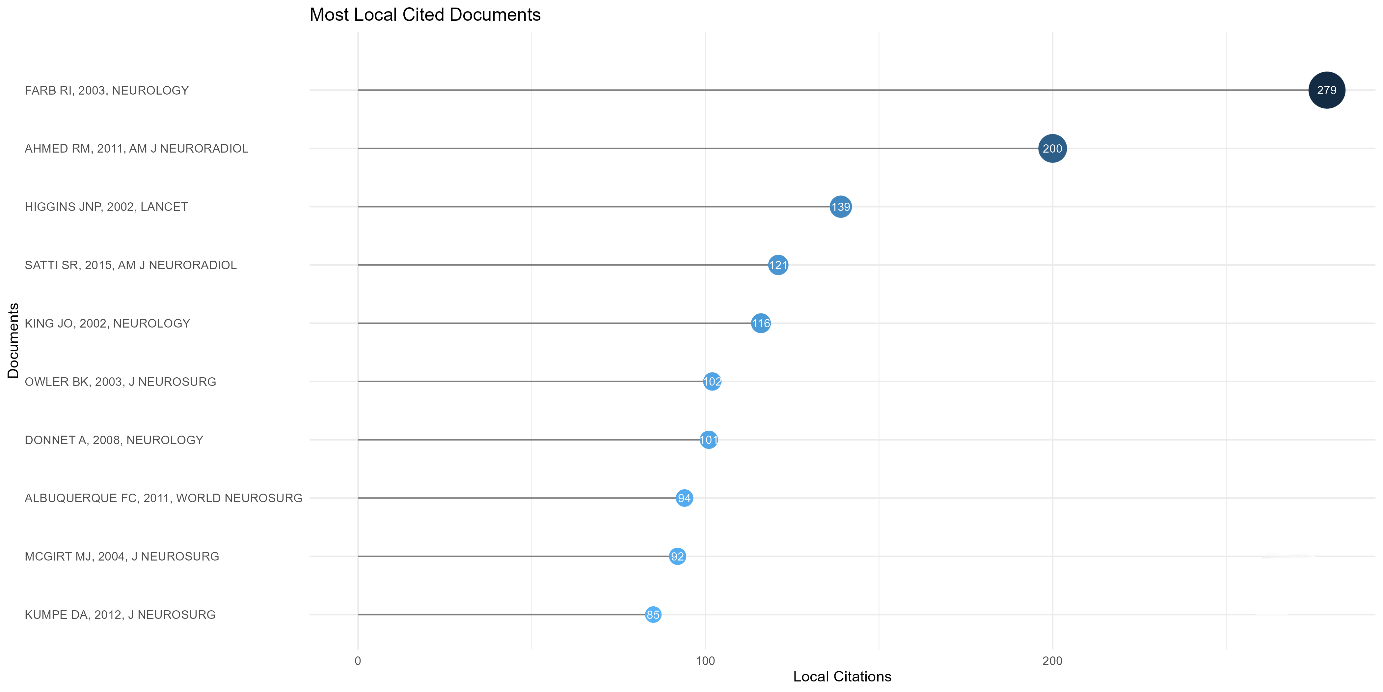


**Figure S2. Most cited articles.**

**(a) Global citations**: Total number of citations in all academic literature.

**(b) Local citations**: Citation counts in IIH literature (2000-2024).

Farb et al. (2003, Neurology) ranked first in both lists (global: 494 citations, local: 279 citations). Ahmed et al. (2011, AJNR) and Higgins et al. (2003, J Neurol Neurosurg Psychiatry) followed in global citations, while Friedman and Wall (2013, Neurology) and Digre et al. (2009, Neurology) stood out in local citations.


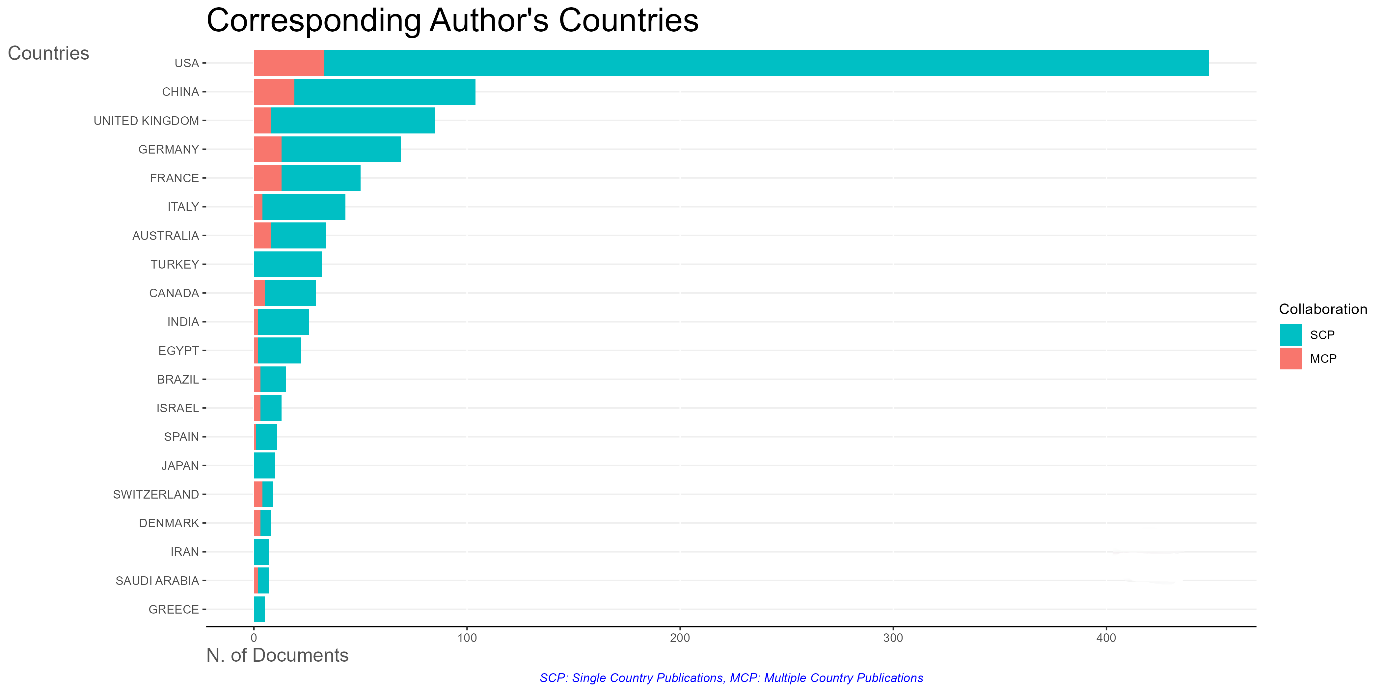


**Figure S3. Country distribution of corresponding authors.**The number of publications and collaboration types by country are shown (SCP: single country publications, Single Country Publications; MCP: multi-country publications, Multiple Country Publications). The USA (n≈450), China (n≈100) and the UK (n≈80) had the highest number of publications. The US was dominated by SCP, while China and the UK had a higher proportion of MCP. Turkey ranked 7th in the number of publications


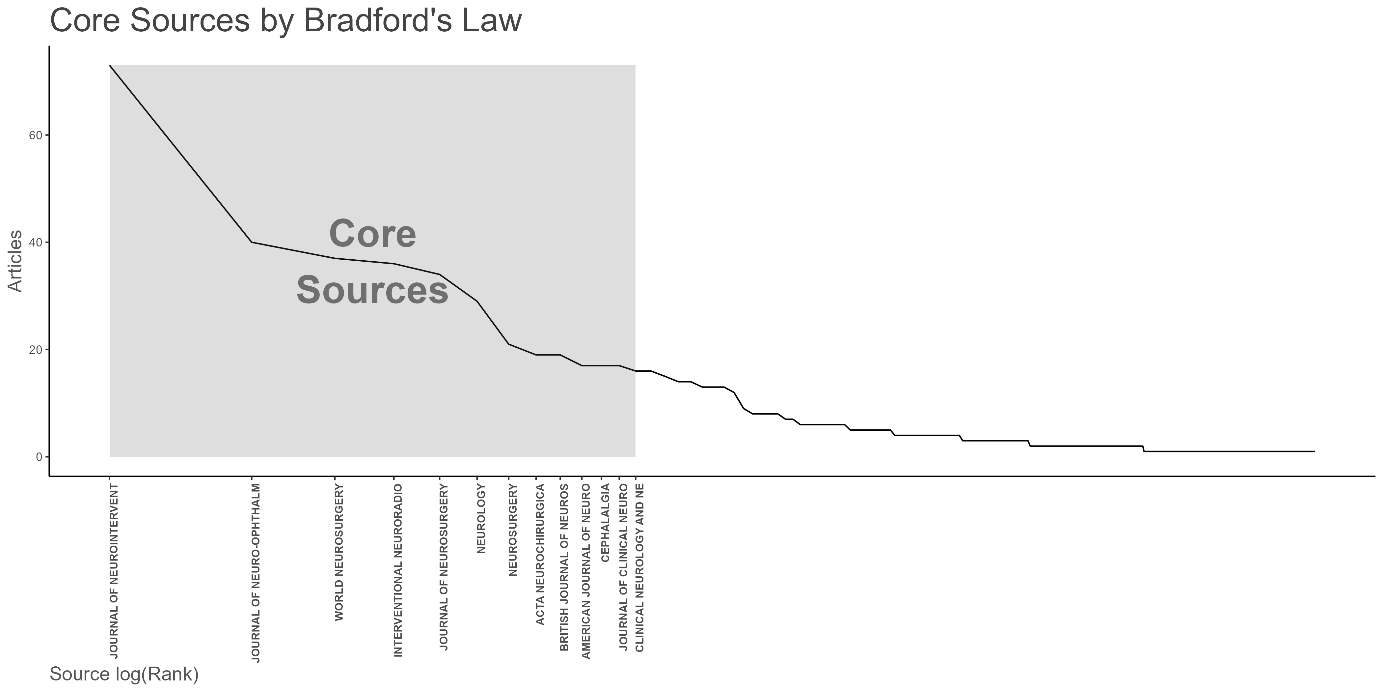


**Figure S4. Bradford analysis of journal distribution.** The Y-axis shows the number of articles and the X-axis shows the journals (sorted by number of publications). The core region (gray area) represents the most productive journals. The top 5-6 journals account for about one third (33%) of total publications.


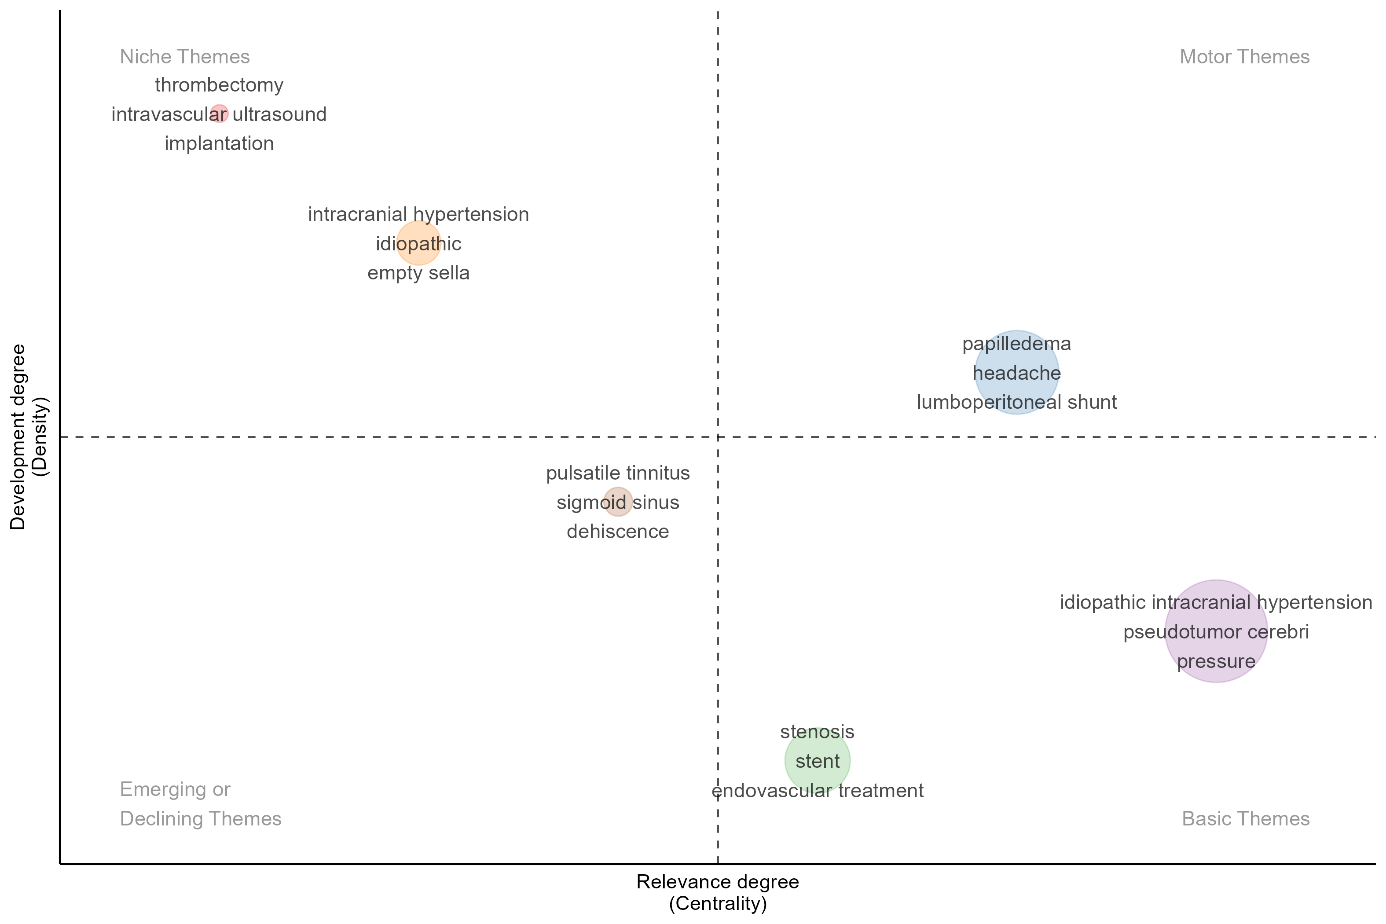


**Figure S5. Temporal distribution of treatment approaches (2000–2024).** The stacked area chart shows the proportional distribution of treatment modalities across five-year periods. In the 2000–2005 period, the ‘Other/mixed’ category constituted approximately 40%, while venous sinus stenting was seen at 30%, optic nerve sheath fenestration (ONSF) at 15%, cerebrospinal fluid (CSF) shunting at 10%, and medical treatment at 5%. By 2021–2024, venous sinus stenting had increased to its highest level at 45–50%, while CSF shunting remained stable at 10–15%, ONSF at 5–10%, and medical treatment at 3–5%.
